# Supplementary material for: Nano-sized aggregate Ti3C2–TiO2 supported on the surface of Ag2NCN as a Z-scheme catalyst with enhanced visible light photocatalytic performance
Source: Royal Society of Chemistry journal article supplement (doi:10.1039/d3dt02430j), 2023-01-01
Supplement: d3dt02430j1.pdf [file d3dt02430j1.pdf]

Electronic Supplementary Information (ESI) for

**Nano-sized aggregate  $\text{Ti}_3\text{C}_2\text{-TiO}_2$  supported on the surface of  $\text{Ag}_2\text{NCN}$  as a Z-scheme catalyst with enhanced visible light photocatalytic performance**

Haidong Yu <sup>a</sup>, Xuan Cao <sup>b,\*</sup>, Shuji Zhang <sup>a</sup>, Shanxia Luo <sup>a</sup>, Liang Feng <sup>a</sup>, Xiaoyu An <sup>a</sup>  
and Haibing Jiang <sup>a,\*</sup>

<sup>a</sup> *Langfang Natural Resources Comprehensive Survey Center, China Geological Survey, Langfang 065000, China*

<sup>b</sup> *Liaoning Engineering Research Center for Treatment and Recycling of Industrially Discharged Heavy Metals, Shenyang University of Chemical Technology, Shenyang 110142, China*

\*Correspondence E-mail: [caoxuan@syuct.edu.cn](mailto:caoxuan@syuct.edu.cn)

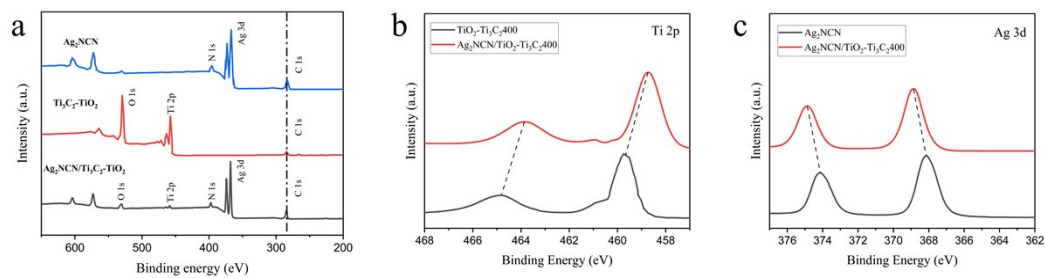

**Figure S1** (a) Survey XPS spectrum of as-prepared catalysts. (b, c) XPS spectrum of the Ti 2p and Ag 3d for as-prepared catalysts.

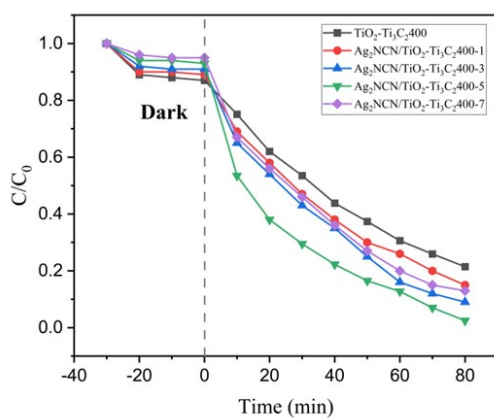

**Figure S2** The photocatalytic activities of composites with different content of Ag<sub>2</sub>NCN for Rh B degradation under visible light illumination ( $\lambda > 420$  nm).

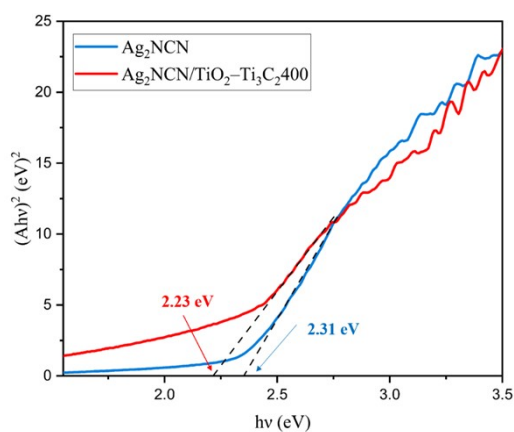

**Figure S3** The band gap energies of Ag<sub>2</sub>NCN and Ag<sub>2</sub>NCN/TiO<sub>2</sub>-Ti<sub>3</sub>C<sub>2</sub>400.

| Title | Peak position<br>ev | Peak area (P)<br>CPS.eV | Atomic<br>% |
|-------|---------------------|-------------------------|-------------|
| C 1s  | 284.57              | 342325.74               | 47.69       |
| Ag 3d | 367.98              | 2666938.77              | 17.74       |
| N 1s  | 397.35              | 182070.49               | 16.32       |
| O 1s  | 531.05              | 250710.81               | 13.02       |
| Ti 2p | 458.9               | 148901.43               | 5.23        |

**Table S1** The main elements percentage ratio for the  $\text{Ag}_2\text{NCN}/\text{TiO}_2\text{-Ti}_3\text{C}_2400$  composite detected by XPS.

### Synthesis of $\text{Ag}_2\text{NCN}/\text{TiO}_2\text{-Ti}_3\text{C}_2$ nanocomposites

$\text{Ag}_2\text{NCN}/\text{TiO}_2\text{-Ti}_3\text{C}_2400$  with different content of  $\text{Ag}_2\text{NCN}$  was prepared through a simple physical weak interaction deposition process.  $\text{AgNO}_3$  was first dissolved in 20 mL of deionized water. Following that,  $\text{NH}_3\cdot\text{H}_2\text{O}$  (1.5 M) aqueous solution was swiftly added and fixed volume to 200mL with deionized water to make a clear solution under magnetic stirring, and afterwards, 0.1 g of  $\text{TiO}_2\text{-Ti}_3\text{C}_2$  was added. After 20 minutes of ultrasonic processing,  $\text{H}_2\text{NCN}$  (5.0 mmol) was added dropwise while being stirred for 30 minutes. The precipitate that resulted was then dried in an oven at 60 °C to produce the products. The amount of reagent added was shown in the Table S2.

| Sample                                                                 | $\text{Ag}_2\text{NCN}$<br>(mmol) | $\text{NH}_3\cdot\text{H}_2\text{O}$ (1.5M)<br>(mL) | $\text{TiO}_2\text{-Ti}_3\text{C}_2$<br>(g) | $\text{H}_2\text{NCN}$<br>(mL) |
|------------------------------------------------------------------------|-----------------------------------|-----------------------------------------------------|---------------------------------------------|--------------------------------|
| $\text{TiO}_2\text{-Ti}_3\text{C}_2400$                                | 0                                 | 0                                                   | 0.1                                         | 0                              |
| $\text{Ag}_2\text{NCN}/\text{TiO}_2\text{-Ti}_3\text{C}_2400\text{-1}$ | 1.0                               | 25.0                                                | 0.1                                         | 1.0                            |
| $\text{Ag}_2\text{NCN}/\text{TiO}_2\text{-Ti}_3\text{C}_2400\text{-3}$ | 3.0                               | 75.0                                                | 0.1                                         | 3.0                            |
| $\text{Ag}_2\text{NCN}/\text{TiO}_2\text{-Ti}_3\text{C}_2400\text{-5}$ | 5.0                               | 125.0                                               | 0.1                                         | 5.0                            |
| $\text{Ag}_2\text{NCN}/\text{TiO}_2\text{-Ti}_3\text{C}_2400\text{-7}$ | 7.0                               | 175.0                                               | 0.1                                         | 7.0                            |

**Table S2** The amount of reagent added for preparing  $\text{Ag}_2\text{NCN}/\text{TiO}_2\text{-Ti}_3\text{C}_2400$  with different content of  $\text{Ag}_2\text{NCN}$ .
